# Supplementary material
Source: Research Square preprint supplement (doi:10.21203/rs.3.rs-9437961/v1)

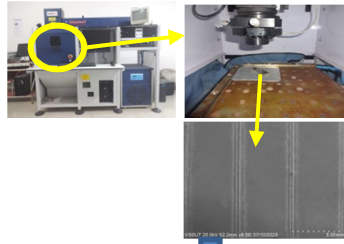

### Machinability Study

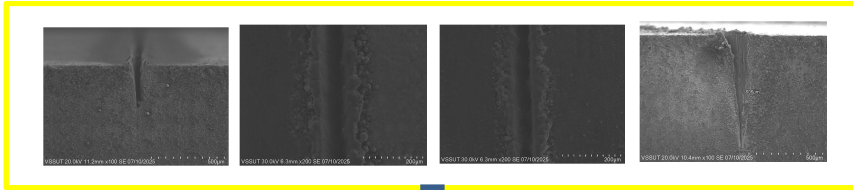

### Groove Quality Mapping

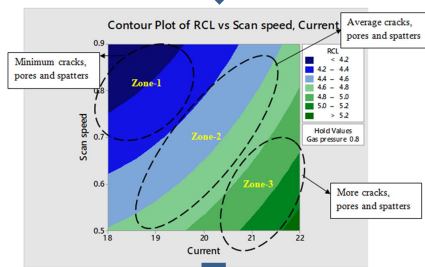

### Micro Groove Characterization

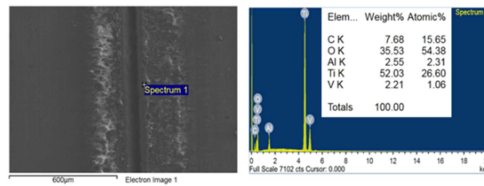

Supplement: Supplementary file 1 [file cde5648720d22a0b51404bd8.pdf]
